# Supplementary material for: Regioselective condensation of hydroxyaromatic compounds with 2,5-dimethoxytetrahydrofuran: facile one-pot synthesis of new substituted diaryl-fused 2,8-dioxabicyclo[3.3.2]nonanes comprising central ketal moieties
Source: Royal Society of Chemistry journal article supplement (doi:10.1039/c9nj06232g), 2020-01-01

*Electronic Supplementary Information*

**Regioselective condensation of hydroxyaromatic compounds with  
2,5-dimethoxytetrahydrofuran: Facile one-pot synthesis of new substituted  
diaryl-fused 2,8-dioxabicyclo[3.3.2] nonanes comprising  
central ketal moieties**

Ali Rahmatpour\*, Pourya Aslani

*Polymer Chemistry Research Laboratory, Faculty of Chemistry, Shahid Beheshti University, P. O. Box: 19839-4716, Tehran, Iran; Fax: +98 21 22431671; Tel: +98 21 29903250*

*Corresponding author E-mail: a\_rahmatpour@sbu.ac.ir*

| <b>Table of contents</b>                                                                                            | <b>Page</b> |
|---------------------------------------------------------------------------------------------------------------------|-------------|
| Materials and instrumentation                                                                                       | 1           |
| General experimental method for <b>4d</b>                                                                           | 2           |
| Synthetic procedure for <b>4d</b> using TFA system                                                                  | 2           |
| Synthetic procedure for <b>8</b> using TFA system                                                                   | 2           |
| Crystal data of <b>4d</b>                                                                                           | 3           |
| Spectral data for compound <b>4d</b>                                                                                | 4-9         |
| (Copies of <sup>1</sup> HNMR, expanded <sup>1</sup> H NMR, <sup>13</sup> C NMR and Mass spectra, IR of <b>4d</b> ). |             |
| Mass spectra data of compounds <b>4a</b> , <b>4b</b>                                                                | 10          |
| HRMS of compound <b>6</b>                                                                                           | 11          |

**General experimental methods (Materials and instruments):** Unless otherwise stated, solvents and all reagents were commercially purchased and used without further purification. Melting points were determined with a Buchi 535 melting point apparatus. UV spectra were recorded on a Pharmacia Biotech Ultraspec 3000 model 80-2106-20 spectrometer. IR and FTIR spectra were recorded using a Perkin-Elmer 781 and Unicam Matteson 1000 spectrometers, respectively. <sup>1</sup>H NMR and <sup>13</sup>C NMR spectra were recorded on a 250 MHz Bruker Avance DPX-250 spectrometer using tetramethyl silane (TMS) as an internal standard at 25 °C with frequencies of 250 and 62.9 MHz for the <sup>1</sup>H and <sup>13</sup>C NMR spectra, respectively (CDCl<sub>3</sub> or DMSO as a solvent). Mass spectra were recorded on GCMS-Trio1000 (Fisons) and Shimadzo

GCMS-Qp1000 EX instruments at 70 eV. Elemental analysis was performed on a Heraeus CHN-O-Rapid system.

**Typical experimental procedure for 4d:**

Phenolic compound **1d** (2.0 mmol), 2,5-dimethoxytetrahydrofuran (**2**, 1equiv.), and *p*-TSA (34 mg, 0.1 mmol) were dissolved in CH<sub>2</sub>Cl<sub>2</sub> (20 mL) under nitrogen atmosphere. The resulting mixture was stirred at room temperature for 3 h. The reaction mixture was then transferred to a separatory funnel containing water and extracted with CH<sub>2</sub>Cl<sub>2</sub> (2 × 20 mL). The combined organic extracts were dried over Na<sub>2</sub>SO<sub>4</sub>, and solvent was removed in *vacuo*. The crude product **4d** thus obtained were found to be clean upon TLC examination. The crude product was purified by recrystallizing from acetic acid. Yield 80%.

**Synthetic procedure for 4d using TFA system:**

Phenolic compound (**1d**, 2 mmol) was dissolved in CH<sub>2</sub>Cl<sub>2</sub> (10 mL) and TFA (10 mL). 2,5-dimethoxytetrahydrofuran (**2**, 1 mmol) was added over 0.5 h while stirring was continued for an additional 3 h, after which the reaction was quenched with excess saturated aqueous Na<sub>2</sub>CO<sub>3</sub>. The organic layer was extracted with CH<sub>2</sub>Cl<sub>2</sub>, dried with MgSO<sub>4</sub>, and the solvent was evaporated in *vacuo*. The crude product **4d** thus obtained were found to be clean upon TLC examination. The crude product was purified by recrystallization. Yield 75%.

**Synthetic procedure for 8 using TFA system:**

2,7-dihydroxynaphthalene (**7**, 2 mmol) and 2,5-dimethoxytetrahydrofuran (**2**, 2 mmol, 1/1 mole ratio) and trifluoroacetic acid, TFA (10 mL) in CH<sub>2</sub>Cl<sub>2</sub> (10 mL) were mixed in a round-bottomed flask at room temperature. The reaction mixture was then stirred at room temperature for 5 h and then the reaction mixture was quenched with excess saturated aqueous Na<sub>2</sub>CO<sub>3</sub>. The organic layer was extracted with CH<sub>2</sub>Cl<sub>2</sub>, dried with MgSO<sub>4</sub>, and the solvent was evaporated in *vacuo*. The crude product was washed with water several times and boiled with water to remove unreacted diphenol. The residue was purified by recrystallizing from ethanol-water (5/1,v/v) mixture to afford **8** as white solid in 71% yield.

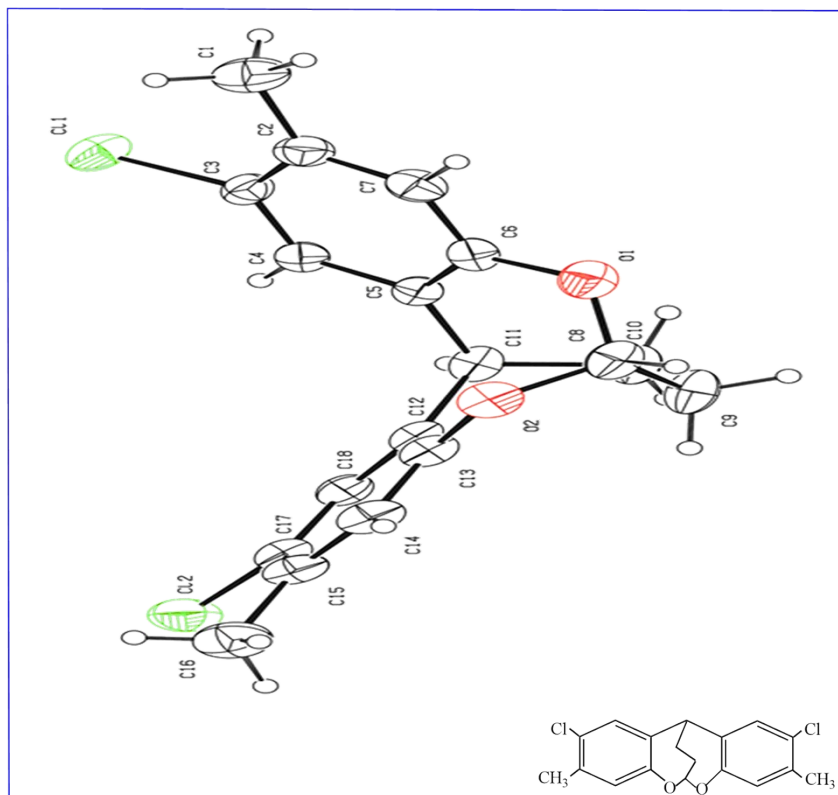

Crystal data

$C_{18}H_{16}Cl_2O_2$

$M_r = 696.000$

$Z, \text{ Calculated density } 4, 1.407 \text{ Mg/m}^3$

Temperature 298(2) K

$a = 22.398(5) \text{ \AA}$

$b = 9.4469(19) \text{ \AA}$

$c = 7.4776(15) \text{ \AA} \quad \theta = 1.8\text{--}28.0^\circ$

$\alpha = 90 \text{ deg} \quad \mu = 0.07 \text{ mm}^{-1}$

$\beta = 90$

$\gamma = 90$

Crystal size 0.50 x 0.45 x 0.40 mm

$\lambda, \text{ Wavelength } 0.71073 \text{ \AA}$

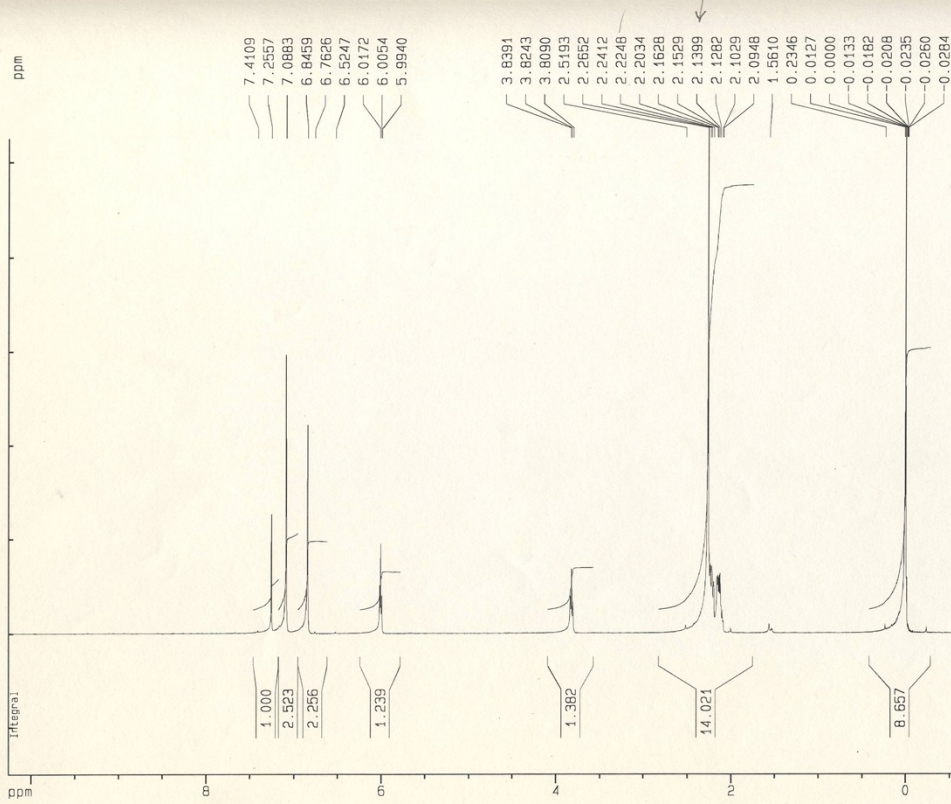

Current Data Parameters  
 NAME Rannatpur-1  
 EXPNO 1  
 PROCNO 1

F2 - Acquisition Parameters  
 Date\_ 9.33  
 Time 9.33  
 INSTRUM spect  
 PROBHD 10 mm Multinu  
 PULPROG zg30  
 TD 16384  
 SOLVENT CDC13  
 NS 10  
 DS 0  
 SWH 5144.033 Hz  
 FIDRES 0.313967 Hz  
 AQ 1.5925748 sec  
 RG 64  
 DW 97.200 usec  
 DE 6.00 usec  
 TE 300.0 K  
 D1 1.0000000 sec  
 P1 10.50 usec  
 DE 6.00 usec  
 SF01 250.1315447 MHz  
 NUC1 1H  
 PL1 -5.00 dB

F2 - Processing parameters  
 SI 16384  
 SF 250.1300089 MHz  
 WDW EM  
 SSB 0  
 LB 0.30 Hz  
 GB 0  
 PC 1.50

1D NMR plot parameters  
 CX 20.00 cm  
 F1P 10.260 ppm  
 F1 2566.28 Hz  
 F2P -0.531 ppm  
 F2 -132.72 Hz  
 PRMCM 0.53952 ppm/cm  
 HZCM 134.94966 Hz/cm

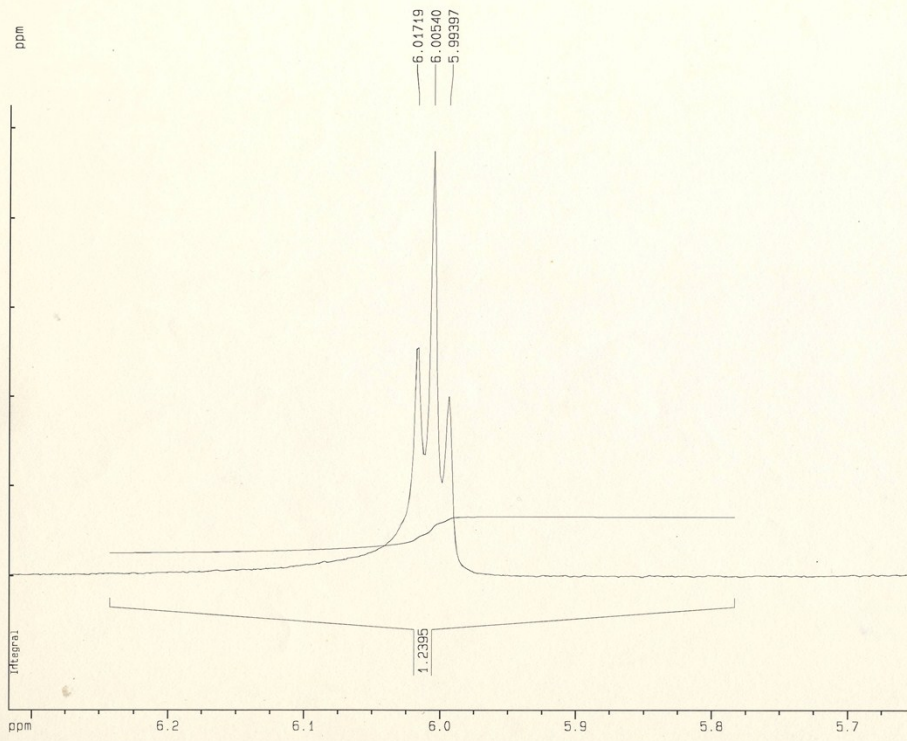

```

Current Data Parameters
NAME      Rahmatpour-1
EXPNO    1
PROCNO   1

F2 - Acquisition Parameters
Date_    96-11-27
Time     9.33
INSTRUM  spect
PROBHD   10 mm Multinu
PULPROG  zg30
TD        16384
SOLVENT  CDCl3
NS        10
DS        0
SWH       5144.033 Hz
FIDRES    0.313967 Hz
AQ        1.5925748 sec
RG         64
DK        97.200 usec
DE        6.00 usec
TE        300.0 K
D1        1.0000000 sec
P1        10.50 usec
DE        6.00 usec
SF01     250.1315447 MHz
NUC1      1H
PL1       -5.00 dB

F2 - Processing parameters
SI        16384
SF        250.1300089 MHz
WDW       EM
SSB       0
LB        0.30 Hz
GB        0
PC        1.50

1D NMR plot parameters
CX        20.00 cm
F1P       6.317 ppm
F1        1579.99 Hz
F2P       5.656 ppm
F2        1414.63 Hz
PPMCM     0.03306 ppm/cm
HZCM      6.26825 Hz/cm

```

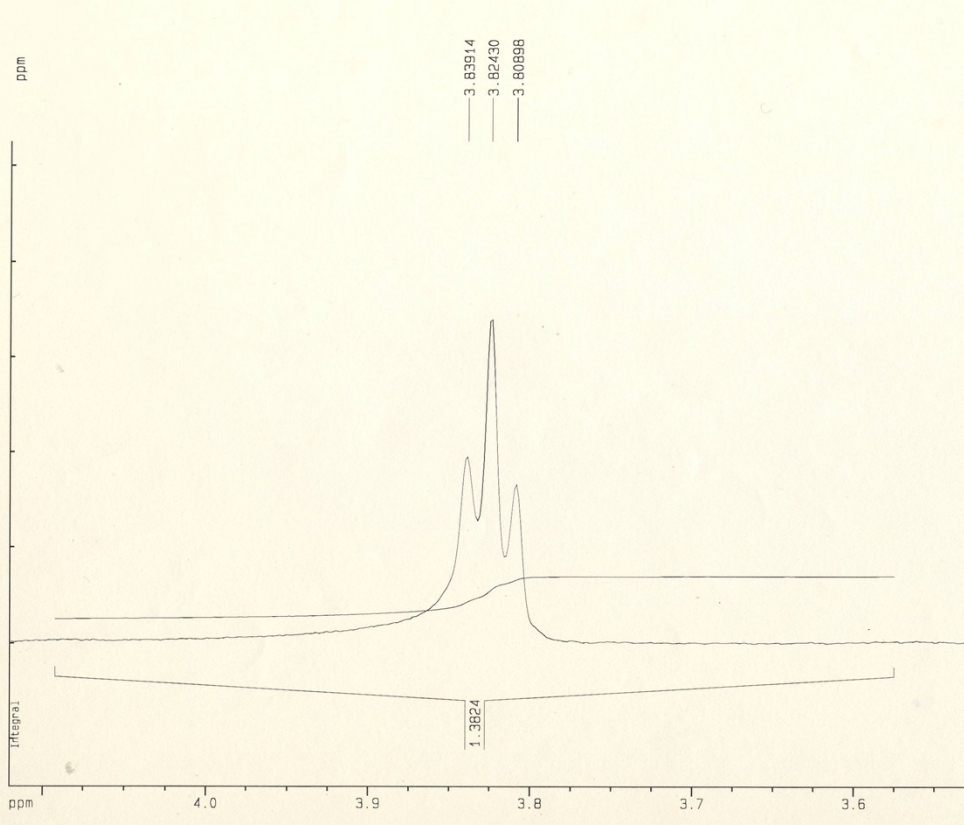

Current Data Parameters  
 NAME Rahmatpour-1  
 EXPNO 1  
 PROCNO 1

F2 - Acquisition Parameters  
 Date\_ 15/01/17  
 Time 9.33  
 INSTRUM spect  
 PROBHD 10 mm Multinu  
 PULPROG zg30  
 TD 16384  
 SOLVENT CDCl3  
 NS 10  
 DS 0  
 SWH 5144.033 Hz  
 FIDRES 0.313967 Hz  
 AQ 1.5925748 sec  
 RG 64  
 DW 97.200 usec  
 DE 8.00 usec  
 TE 300.0 K  
 D1 1.0000000 sec  
 P1 10.50 usec  
 DE 8.00 usec  
 SFO1 250.1315447 MHz  
 NUC1 1H  
 PL1 -5.00 dB

F2 - Processing parameters  
 SI 16384  
 SF 250.1300069 MHz  
 WDW EM  
 SSB 0  
 LB 0.30 Hz  
 GB 0  
 PC 1.50

1D NMR plot parameters  
 CX 20.00 cm  
 F1P 4.121 ppm  
 F1 1030.74 Hz  
 F2P 3.531 ppm  
 F2 883.10 Hz  
 PPMCM 0.02951 ppm/cm  
 HZCM 7.38237 Hz/cm



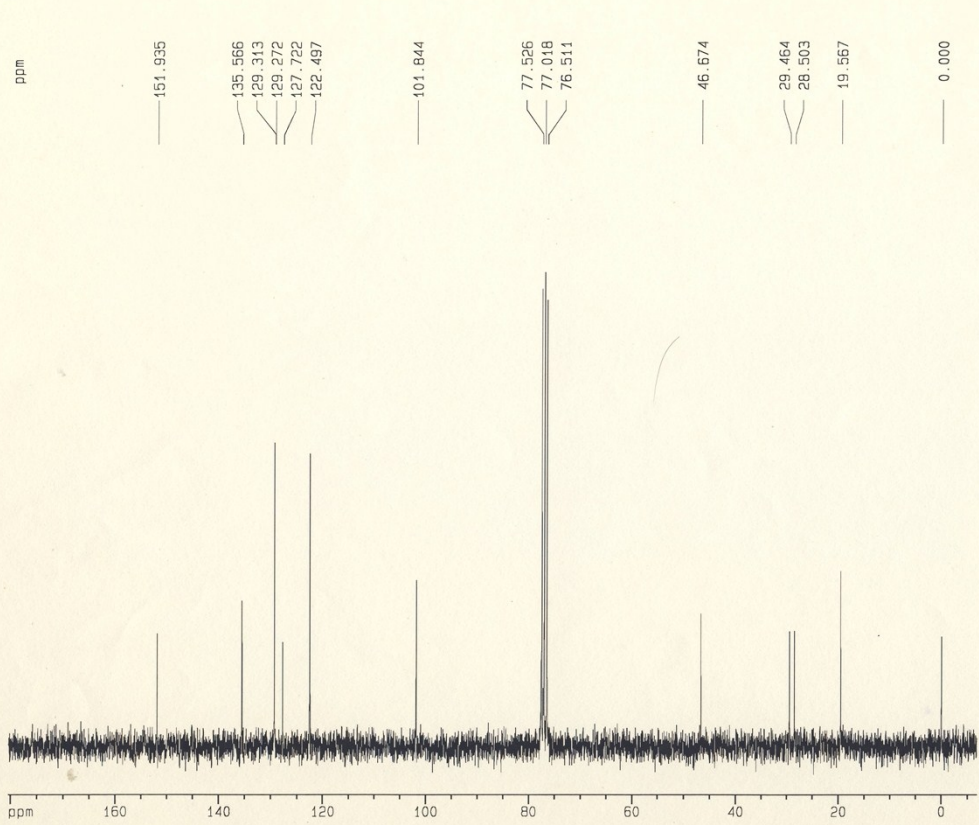

```

Current Data Parameters
NAME      Rahmatour-1.c
EXPNO    1
PROCNO   1

F2 - Acquisition Parameters
Date_    20070907
Time     9.47
INSTRUM  spect
PROBHD   10 mm Multinu
PULPROG  zgpg30
TD        65536
SOLVENT  CDCl3
NS        125
DS        0
SWH       19841.270 Hz
FIDRES    0.302754 Hz
AQ        1.6515572 sec
RG         255
DN         25.200 usec
DE         5.00 usec
TE        300.0 K
D12       0.0002000 sec
RL13      17.00 dB
Q1         2.0000000 sec
CPDPRG2  waltz16
PCPD2     97.00 usec
SFO2      250.1315447 MHz
NUC2       13C
PL2        -5.00 dB
PL12       17.00 dB
P1         8.00 usec
DE         6.00 usec
SFO1      62.9031573 MHz
NUC1       13C
PL1        -3.00 dB
D11        0.0300000 sec

F2 - Processing parameters
SI         32768
SF         62.8952398 MHz
WDW        EM
SSB         0
LB          1.00 Hz
GB          0
PC          1.00

1D NMR plot parameters
CX         20.00 cm
F1P        180.372 ppm
F1         11344.57 Hz
F2P         -6.679 ppm
F2         -432.63 Hz
PP4CM      9.36255 ppm/cm
HZCM       588.85974 Hz/cm
  
```

*C H Ocl*  
*18 162 2*

*123/20*

*C H Ocl*  
*18 162 334 4-*  
*335*  
*16*  
*31 16*  
*302*

MW=335  
File : RAHMATPO.X12 Date 6/9/88 Time 11:2:29  
S=[51->80] Bp=179 Bi=19700. RT=1.32 CT=109

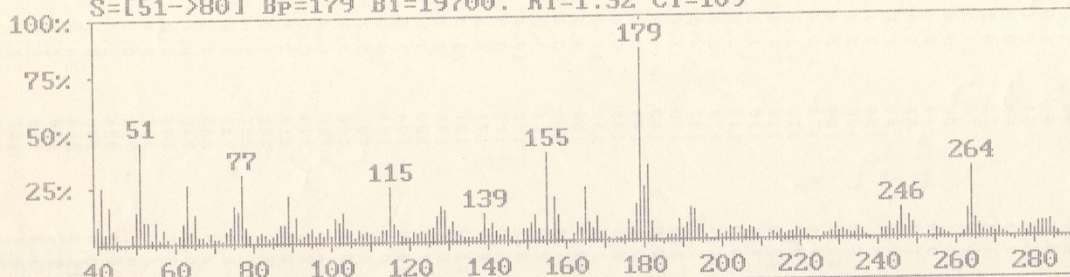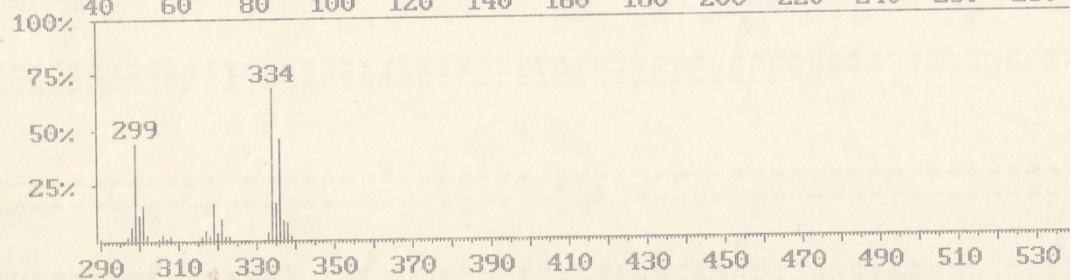

SB=40 SE=339 DB=40 DE=510 N=0 Z=2 T=0.0 Fact[ -> ] \*1  
S List > S=[51->80] B=0 Pos=1 Tot=1

*S*



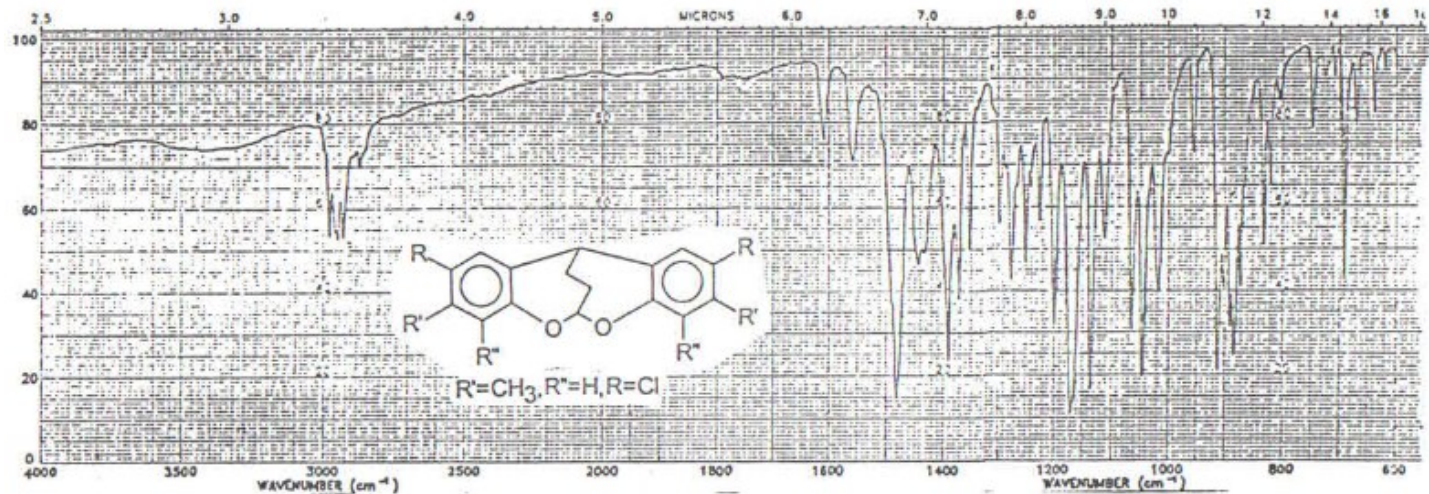

MALACO 117 (2.122) Cm (90:133-(1.9+164.341))

179.10

Scan EI -  
8.73e5

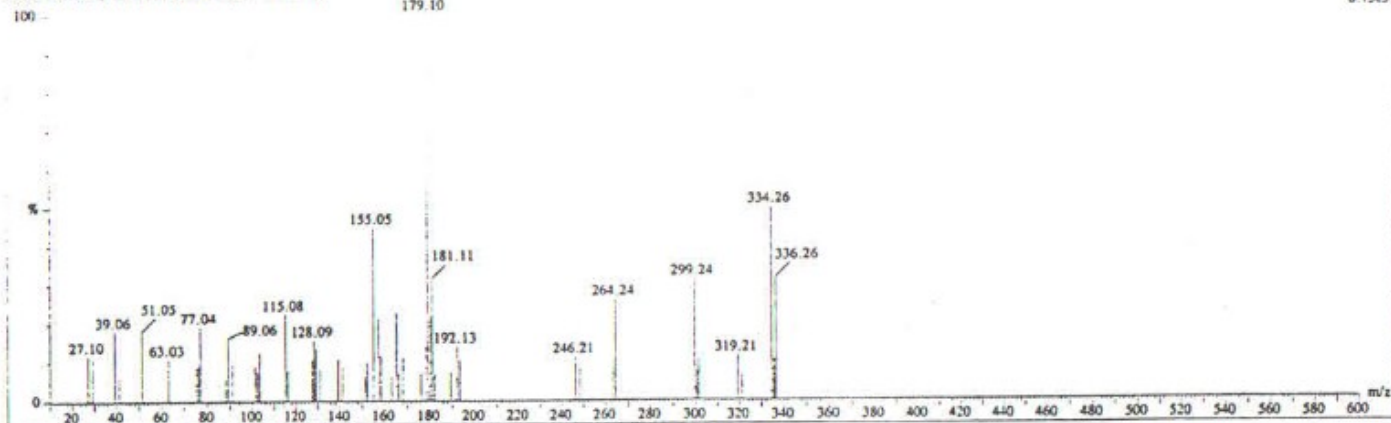

File : RAHMATPO.X03 Date 5/25/ Time 10:47:08  
S=[159->320] Bp=107 Bi=6160. RT=5.32 CT=289

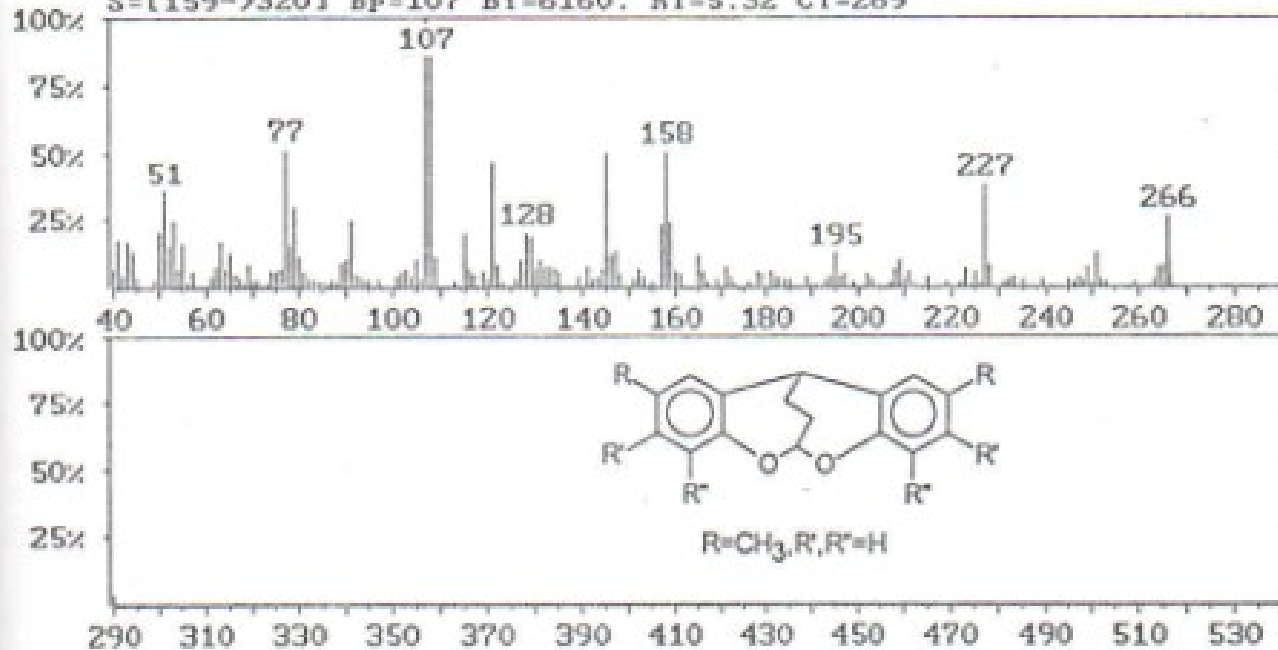

MW=294

File : RAHMATPO.X11 Date 6/2/ Time 13:41:39  
S=[197->263] Bp=69 Bi=9540. RT=4.37 CT=223

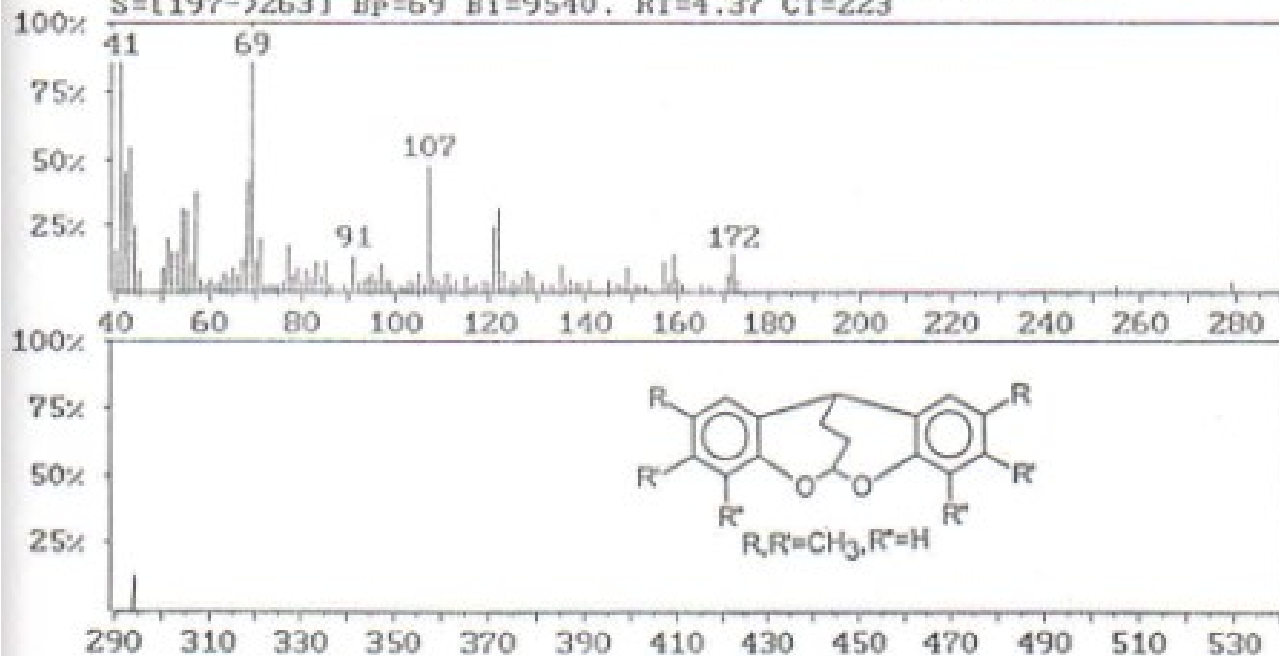

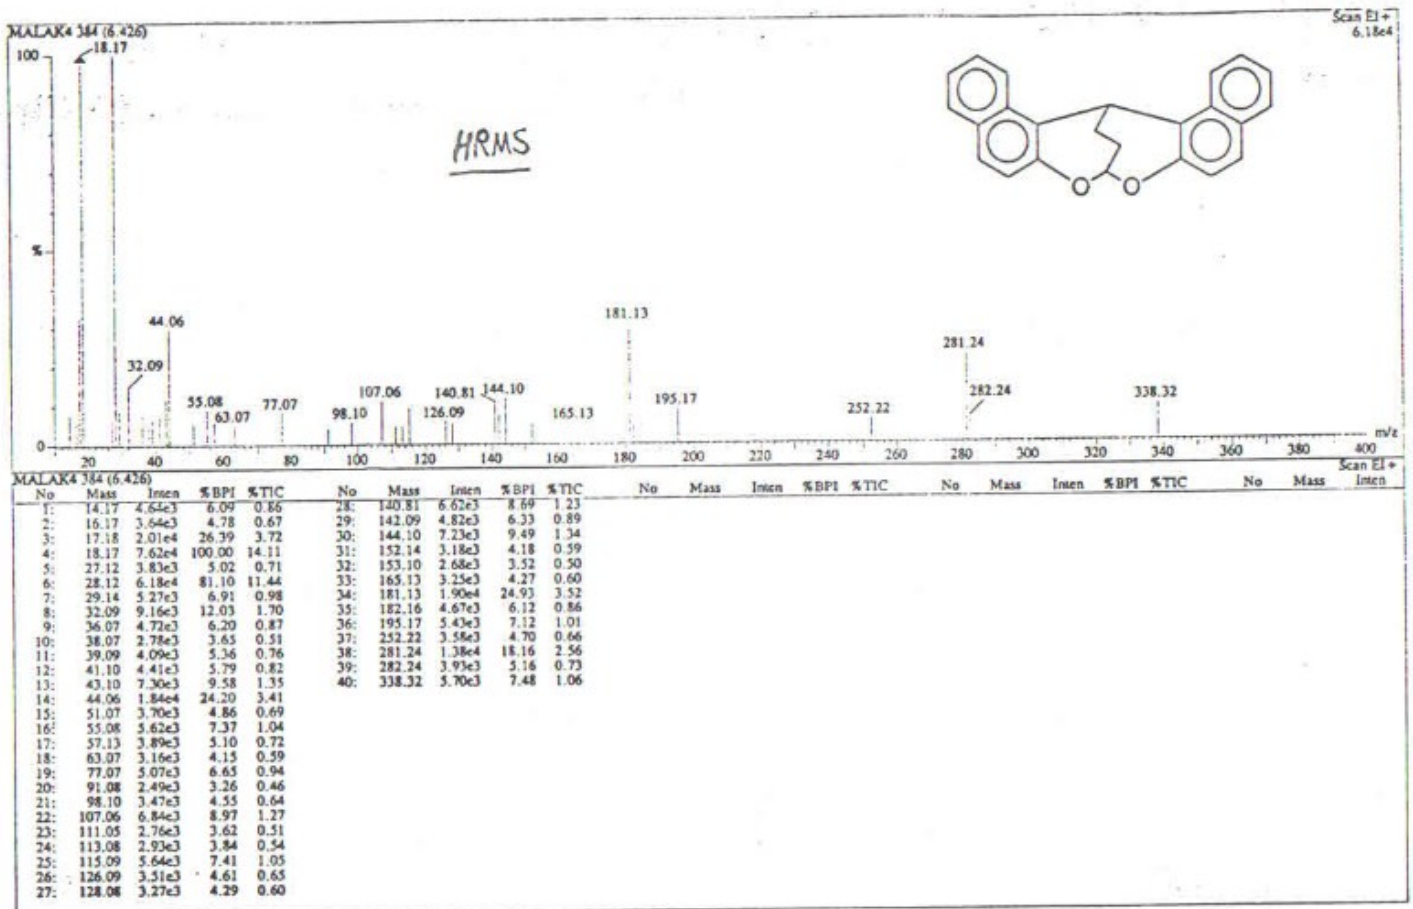

Supplement: c9nj06232g1.pdf [file c9nj06232g1.pdf]
